# Supplementary material for: A chemical coating strategy for assembling a boron-doped diamond anode towards electrocatalytic degradation of late landfill leachate
Source: Royal Society of Chemistry journal article supplement (doi:10.1039/d4ra03107e), 2024-01-01
Supplement: d4ra03107e1.pdf [file d4ra03107e1.pdf]

## Supporting Information

### **A chemical coating strategy for assembling boron-doped diamond anode towards electrocatalytic degradation of late landfill leachate**

Juanmei Zeng<sup>a</sup>, Xi Liu<sup>b</sup>, Qizhi Chen<sup>c</sup>, Dongying Hu<sup>a,\*</sup>

<sup>a</sup> State Key Laboratory of Featured Metal Materials and Life-cycle Safety for Composite Structures, School of Resources, Environment and Materials, Guangxi University, Nanning 530004, China

<sup>b</sup> Guangxi Environmental Protection Industry Development Research Institute Co., Ltd., Guangxi Key Laboratory of environmental pollution control and ecological restoration technology, Nanning 530007, China

<sup>c</sup> Guangxi Huiyuan Manganese Industry Co., Ltd., Laibin 546100, China

\* Corresponding author: Dongying Hu;

Email of Dongying Hu: [hdy@gxu.edu.cn](mailto:hdy@gxu.edu.cn)

Email of Juanmei Zeng: [1184604205@qq.com](mailto:1184604205@qq.com)

Email of Xi Liu: [liuxi1217@foxmail.com](mailto:liuxi1217@foxmail.com)

Email of Qizhi Chen: [184170581@qq.com](mailto:184170581@qq.com)

**Table S1** List of abbreviations

| Full names                                  | Abbreviations         |
|---------------------------------------------|-----------------------|
| Chemical oxygen demand                      | COD                   |
| Biological oxygen demand                    | BOD <sub>5</sub>      |
| Biodegradability                            | BOD <sub>5</sub> /COD |
| Total organic carbon                        | TOC                   |
| Ammonia nitrogen                            | NH <sub>3</sub> -N    |
| Chloride ions                               | Cl <sup>-</sup>       |
| Total nitrogen                              | TN                    |
| Nitrate nitrogen                            | NO <sub>3</sub> -N    |
| X-ray diffraction                           | XRD                   |
| Scanning electron microscope                | SEM                   |
| Energy-dispersive X-ray spectrometer        | EDS                   |
| Three-dimensional fluorescence spectroscopy | EEM                   |
| Gas chromatography-mass spectrometer        | GC-MS                 |
| Cyclic voltammetry                          | CV                    |
| Nyquist curves                              | EIS                   |
| Linear sweep voltammetry                    | LSV                   |

**Table S2** Correspondence between peak area of fluorescence spectrum and properties of organic matter

| Regions | $\lambda_{Ex}$ (nm) | $\lambda_{Em}$ (nm) | Category                      |
|---------|---------------------|---------------------|-------------------------------|
| I       | 220~250             | 280~330             | Aromatic protein I            |
| II      | 220~250             | 230~380             | Aromatic protein II           |
| III     | 220~250             | 380~500             | Fulvic acid                   |
| IV      | 250~280             | 290~380             | Soluble microbial metabolites |
| V       | 290~360             | 380~500             | Humic acid substance          |

**Table S3** Analysis of organic species by GC-MS spectra (0 h, 2 h, 4 h and 5 h)

| Name                            | Molecular formula                              | Molecular weight | Peak time |       |       |      | Peak area |       |       |       |  |
|---------------------------------|------------------------------------------------|------------------|-----------|-------|-------|------|-----------|-------|-------|-------|--|
|                                 |                                                |                  | 0 h       | 2 h   | 4 h   | 5 h  | 0 h       | 2 h   | 4 h   | 5 h   |  |
| 3-Nonyn-2-ol                    | C <sub>9</sub> H <sub>16</sub> O               | 140              |           | 3.789 |       |      |           | 0.19  |       |       |  |
| 1,4,6,6-tetramethyl-Cyclohexene | C <sub>10</sub> H <sub>18</sub>                | 138              |           | 3.997 |       |      |           | 0.248 |       |       |  |
| 4 4-Ethyl-1-hexyn-3-ol          | C <sub>8</sub> H <sub>14</sub> O               | 126              |           | 4.27  |       |      |           | 0.264 |       |       |  |
| 1-Azabicyclo[3.2.1]octan-6-ol   | C <sub>7</sub> H <sub>13</sub> NO              | 127              |           | 5.023 |       |      |           | 0.084 |       |       |  |
| 3-O-Benzyl-d-glucose            | C <sub>13</sub> H <sub>16</sub> O <sub>4</sub> | 236              |           | 5.071 |       |      |           | 0.101 |       |       |  |
| Cyclopentanecarboxaldehyde      | C <sub>6</sub> H <sub>10</sub> O               | 98               |           | 5.225 |       |      |           | 0.096 |       |       |  |
| Spiro[3.4]octan-5-one           | C <sub>8</sub> H <sub>12</sub> O               | 124              |           | 5.653 |       |      |           | 0.09  |       |       |  |
| Linalool                        | C <sub>10</sub> H <sub>18</sub> O              | 154              |           | 5.765 |       |      |           | 0.081 |       |       |  |
| dichloronitro- Methane          | CHCl <sub>2</sub> NO <sub>2</sub>              | 130              | 11.101    | 5.848 | 5.854 | 5.86 | 0.154     | 0.064 | 0.101 | 0.078 |  |
| 1-Piperidinecarbonitrile        | C <sub>6</sub> H <sub>10</sub> N <sub>2</sub>  | 110              |           | 6.169 |       |      |           | 0.056 |       |       |  |

|                                                                                        |                                                 |     |                           |                 |        |        |       |  |       |       |       |
|----------------------------------------------------------------------------------------|-------------------------------------------------|-----|---------------------------|-----------------|--------|--------|-------|--|-------|-------|-------|
| 1,3-dithian-2-ylphenyl-Methanone,; exo-2,7,7-trimethylbicyclo[2.2.1]heptan-2-ol        | C <sub>11</sub> H <sub>12</sub> OS <sub>2</sub> | 224 |                           | 6.294           | 6.294  |        |       |  | 0.075 | 0.107 |       |
| 5-Hydroxy-4,4,6-trimethyl-7-oxabicyclo [4.1.0]heptan-2-one                             | C <sub>10</sub> H <sub>18</sub> O               | 162 |                           | 6.691           |        |        |       |  | 0.089 |       |       |
| 2-butyl-1-Octanol                                                                      | C <sub>9</sub> H <sub>14</sub> O <sub>3</sub>   | 170 |                           | 7.172           |        |        |       |  | 0.096 |       |       |
| Tetradecane                                                                            | C <sub>12</sub> H <sub>26</sub> O               | 186 |                           | 7.623           | 8.591  | 8.591  |       |  | 0.139 | 0.047 | 0.052 |
| 2,2-dimethyl-5-(3-methyloxiranyl)-, [2.alpha. (R*),3.alpha.]-(+)- Cyclohexanone        | C <sub>14</sub> H <sub>30</sub>                 | 198 | 16.301                    | 8.519           | 8.525  | 8.52   | 0.082 |  | 0.083 | 0.068 | 0.043 |
| Tricyclo [4.2.2.0(2,5)]deca-7,9-diene-7,8-dicarboxylic acid, 3-cyano-, dimethyl ester  | C <sub>11</sub> H <sub>18</sub> O <sub>2</sub>  | 182 |                           | 8.626           |        |        |       |  | 0.065 |       |       |
| 4H-Chromene, 4a,5,6,7,8,8a-hexahydro-2,3,5,5,8a-pentamethyl 2-                         | C <sub>15</sub> H <sub>15</sub> NO <sub>4</sub> | 273 |                           | 9.089           | 0.089  |        |       |  | 0.113 | 0.065 |       |
| Butyloxycarbonyloxy-1,1,10-trimethyl-6,9-epidioxydecalin                               | C <sub>14</sub> H <sub>24</sub> O               | 208 |                           | 9.178           |        |        |       |  | 0.071 |       |       |
| 2,6,10-trimethyl-Tetradecane                                                           | C <sub>18</sub> H <sub>30</sub> O <sub>5</sub>  | 326 |                           | 9.309           | 9.172  |        |       |  | 0.125 | 0.065 |       |
| 2,4-Di-tert-butylphenol                                                                | C <sub>17</sub> H <sub>36</sub>                 | 240 | 17.297                    | 9.368           | 9.368  | 10.947 | 0.128 |  | 0.071 | 0.285 | 0.057 |
| 2,5,5,8a-Tetramethyl-4-methylene-6,7,8,8a-tetrahydro-4H,5H-chromen-4a-yl hydroperoxide | C <sub>14</sub> H <sub>22</sub> O               | 206 |                           | 9.517           | 9.516  | 9.519  |       |  | 0.077 | 0.089 | 0.039 |
| 3,7,11-trimethyl-1-Dodecanol,; p-Toluic acid, 5-tridecyl ester                         | C <sub>14</sub> H <sub>22</sub> O <sub>3</sub>  | 238 |                           | 9.582           |        |        |       |  | 0.089 |       |       |
| 7-Methyl-Z-tetradecen-1-ol acetate                                                     | C <sub>15</sub> H <sub>32</sub> O               | 228 |                           | 9.73            | 10.787 |        |       |  | 0.124 | 0.207 |       |
| Disulfide, di-tert-dodecyl                                                             | C <sub>21</sub> H <sub>34</sub> O <sub>2</sub>  | 318 |                           | 9.772           |        |        |       |  | 0.042 |       |       |
| 3-hydroxy-Dodecanoic acid                                                              | C <sub>17</sub> H <sub>32</sub> O <sub>2</sub>  | 268 | 29.174<br>29.947<br>30.81 | 9.896<br>11.303 | 10.852 | 11.06  | 0.357 |  | 0.213 | 0.219 | 0.296 |
| 2-methyl-4-(1,3,3-trimethyl-7-oxabicyclo [4.1.0] hept-2-yl)- 3-                        | C <sub>24</sub> H <sub>50</sub> S <sub>2</sub>  | 402 |                           | 10.175          |        |        |       |  | 0.047 |       |       |
|                                                                                        | C <sub>12</sub> H <sub>24</sub> O <sub>3</sub>  | 216 |                           | 10.306          | 9.309  | 11.457 |       |  | 0.077 | 0.059 | 0.08  |
|                                                                                        | C <sub>14</sub> H <sub>24</sub> O <sub>2</sub>  | 224 |                           | 10.46           |        |        |       |  | 0.077 |       |       |

|                                                                                                 |                                                               |     |        |        |        |                  |       |       |       |       |  |
|-------------------------------------------------------------------------------------------------|---------------------------------------------------------------|-----|--------|--------|--------|------------------|-------|-------|-------|-------|--|
| Buten-2-ol                                                                                      |                                                               |     |        |        |        |                  |       |       |       |       |  |
| Geranyl isovalerate                                                                             | C <sub>15</sub> H <sub>26</sub> O <sub>2</sub>                | 238 |        | 10.567 |        |                  |       |       | 0.113 |       |  |
| N, N'-Bis<br>(Carbobenzyloxy)-<br>lysine methyl(ester)                                          | C <sub>23</sub> H <sub>28</sub> N <sub>2</sub> O <sub>6</sub> | 428 |        | 10.727 |        |                  |       |       | 0.047 |       |  |
| 6-(3-Hydroxy-but-1-<br>enyl)-1,5,5-trimethyl<br>7-<br>oxabicyclo [4.1.0]<br>heptan-2-ol         | C <sub>13</sub> H <sub>22</sub> O <sub>3</sub>                | 226 |        | 10.787 |        |                  |       |       | 0.095 |       |  |
| tert-Hexadecanethiol                                                                            | C <sub>16</sub> H <sub>34</sub> S                             | 258 | 17.535 | 10.941 | 10.235 | 12.027           | 0.095 | 0.071 | 0.077 | 0.138 |  |
| 2-methyl-1-<br>Hexadecanol                                                                      | C <sub>17</sub> H <sub>36</sub> O                             | 256 | 20.241 | 11.451 |        |                  | 0.085 | 0.106 |       |       |  |
| 2,3-dimethyl-5-<br>trifluoromethyl- Phen-<br>1,4-diol                                           | C <sub>9</sub> H <sub>9</sub> F <sub>3</sub> O <sub>2</sub>   | 206 |        | 12.235 |        |                  |       |       | 0.064 |       |  |
| 4-[2-isopropyl-5-<br>methyl-5-(2-methyl-5-<br>oxocyclopentyl)<br>cyclopentenyl]- 2-<br>Butanone | C <sub>20</sub> H <sub>32</sub> O <sub>2</sub>                | 304 |        | 12.3   | 12.3   | 12..3            |       | 0.077 | 0.189 | 0.077 |  |
| Fumaric acid, 2-<br>ethylhexyl tridec-2-yn-<br>1-yl ester                                       | C <sub>25</sub> H <sub>42</sub> O                             | 358 |        | 12.573 |        |                  |       |       | 0.065 |       |  |
| 7,9-Di-tert-butyl-1-<br>oxaspiro (4, 5) deca-<br>6,9-diene-2,8-dione                            | C <sub>17</sub> H <sub>24</sub> O <sub>3</sub>                | 276 | 23.805 | 12.627 | 12.627 | 12.663           | 0.064 | 0.095 | 0.279 | 0.068 |  |
| n-Hexadecanoic acid<br>1,2-<br>Benzenedicarboxylic<br>acid, butyl 8-<br>methylnonyl ester       | C <sub>16</sub> H <sub>32</sub> O <sub>2</sub>                | 256 | 24.191 | 12.763 | 12.763 | 12.769           | 0.13  | 0.095 | 0.201 | 0.084 |  |
| Octadecanoic acid                                                                               | C <sub>22</sub> H <sub>34</sub> O <sub>4</sub>                | 362 |        | 12.87  |        |                  |       |       | 0.095 |       |  |
| Hexadecanamide                                                                                  | C <sub>18</sub> H <sub>36</sub> O <sub>2</sub>                | 284 | 26.542 | 14.039 | 14.039 | 14.039           | 0.089 | 0.071 | 0.116 | 0.137 |  |
| 1,4-<br>Benzenedicarboxylic<br>acid, bis(2-<br>hydroxyethyl) ester                              | C <sub>16</sub> H <sub>33</sub> NO                            | 259 | 26.781 | 14.188 | 14.188 | 14.194           | 0.095 | 0.095 | 0.172 | 0.083 |  |
| (Z)- 9-Octadecenamid                                                                            | C <sub>12</sub> H <sub>14</sub> O <sub>6</sub>                | 254 | 26.998 | 14.36  | 14.372 | 14.384           | 0.146 | 0.131 | 0.232 | 0.131 |  |
| Octadecanamide                                                                                  | C <sub>18</sub> H <sub>35</sub> NO                            | 95  |        | 15.286 | 15.286 | 15.286           |       | 0.148 | 0.225 | 0.142 |  |
| Hexadecanoic acid, 2-<br>hydroxy-1-<br>(hydroxymethyl)ethyl<br>ester                            | C <sub>18</sub> H <sub>37</sub> NO                            | 283 |        | 15.387 | 16.039 |                  | 0.117 | 0.142 | 0.185 | 0.107 |  |
| Z-5-Methyl-6-<br>heneicosen-11-one                                                              | C <sub>19</sub> H <sub>38</sub> O <sub>4</sub>                | 330 |        | 16.039 | 16.039 | 7.178            |       | 0.101 | 0.195 |       |  |
| Oleic acid, 3-                                                                                  | C <sub>22</sub> H <sub>42</sub> O                             | 322 |        | 16.265 | 16.265 | 16.111<br>16.396 |       | 0.166 | 0.314 | 0.160 |  |
|                                                                                                 | C <sub>39</sub> H <sub>76</sub> O <sub>3</sub>                | 592 |        | 17.09  |        | 15.98            |       | 0.093 |       | 0.065 |  |

|                                                                                               |                                                               |     |        |        |        |       |       |             |
|-----------------------------------------------------------------------------------------------|---------------------------------------------------------------|-----|--------|--------|--------|-------|-------|-------------|
| (octadecyloxy) propyl ester                                                                   |                                                               |     |        |        |        |       |       |             |
| (Z)- 13-Docosenamide                                                                          | C <sub>22</sub> H <sub>43</sub> NO                            | 337 |        | 17.405 | 17.404 |       | 0.07  | 0.237       |
| Stearic acid, 3-(octadecyloxy) propyl ester                                                   | C <sub>39</sub> H <sub>78</sub> O <sub>3</sub>                | 594 |        | 18.117 | 17.333 |       | 0.172 | 0.083       |
| 3,6,13,16-tetraoxatricyclo[16.2.2.2(8,11)]tetracos-8,10,18,20,21,23-hexaene-2,7,12,17-tetrone | C <sub>20</sub> H <sub>16</sub> O <sub>8</sub>                | 384 |        | 18.829 |        |       | 0.270 |             |
| 2-Propenoic acid, butyl ester                                                                 | C <sub>7</sub> H <sub>12</sub> O <sub>2</sub>                 | 128 |        | 6.642  | 3.753  |       | 0.198 | 0.226       |
| (1 $\alpha$ ,2 $\beta$ ,6 $\alpha$ )- dicyclo[4.1.0]heptan-2-ol                               | C <sub>7</sub> H <sub>12</sub> O                              | 112 |        |        | 3.985  |       |       | 0.083       |
| 3-(3-hydroxy-1-propenyl)-Cyclopentanone                                                       | C <sub>8</sub> H <sub>12</sub> O <sub>2</sub>                 | 140 |        |        | 4.008  | 4.009 |       | 0.184 0.148 |
| 1-(2,2-dimethylcyclopentyl)-Ethanone                                                          | C <sub>9</sub> H <sub>16</sub> O                              | 140 |        |        | 4.287  | 4.282 |       | 0.291 0.243 |
| 1-Cyclohexene-1-methanol                                                                      | C <sub>7</sub> H <sub>12</sub> O                              | 112 |        |        | 4.501  |       |       | 0.119       |
| 4-Butoxy-2-butanone                                                                           | C <sub>8</sub> H <sub>16</sub> O <sub>2</sub>                 | 144 |        |        | 4.673  |       |       | 0.303       |
| Acetic acid, dichloro-, heptyl ester                                                          | C <sub>9</sub> H <sub>16</sub> Cl <sub>2</sub> O <sub>2</sub> | 227 |        |        | 5.023  | 5.024 |       | 0.1 0.091   |
| Glutaconic acid                                                                               | C <sub>5</sub> H <sub>6</sub> O <sub>4</sub>                  | 130 |        |        | 5.077  |       |       | 0.113       |
| 2-Nitrohept-2-en-1-ol                                                                         | C <sub>7</sub> H <sub>13</sub> NO <sub>3</sub>                | 159 |        |        | 5.368  |       |       | 0.16        |
| Acetophenone                                                                                  | C <sub>8</sub> H <sub>8</sub> O                               | 120 |        |        | 5.496  | 5.469 |       | 0.106 0.073 |
| 2-methoxy- Phenol                                                                             | C <sub>7</sub> H <sub>8</sub> O <sub>2</sub>                  | 124 |        |        | 5.676  |       |       | 0.107       |
| 4-(1,1-dimethylethyl)-Pyridine                                                                | C <sub>9</sub> H <sub>13</sub> N                              | 135 |        |        | 5.759  | 5.736 |       | 0.095 0.047 |
| tetrahydro-4-oxo-3-Thiophenecarboxylic acid, methyl ester                                     | C <sub>6</sub> H <sub>8</sub> O <sub>3</sub> S                | 160 |        |        | 6.092  |       |       | 0.089       |
| Dodecane                                                                                      | C <sub>12</sub> H <sub>26</sub>                               | 170 | 10.069 |        | 6.679  | 6.685 | 0.132 | 0.077 0.066 |
| Decanal                                                                                       | C <sub>10</sub> H <sub>20</sub> O                             | 156 |        |        | 6.762  |       |       | 0.077       |
| Oxybis [dichloro-Methane                                                                      | C <sub>2</sub> H <sub>2</sub> Cl <sub>4</sub> O               | 184 |        |        | 7.712  |       |       | 0.078       |
| 1,3-bis(1,1-dimethylethyl)-Benzene                                                            | C <sub>14</sub> H <sub>22</sub>                               | 190 | 13.892 |        | 7.279  |       | 0.095 | 0.133       |
| Benzene                                                                                       | C <sub>13</sub> H <sub>28</sub>                               | 184 |        |        | 7.623  | 7.629 |       | 0.095 0.089 |
| 4-Hydroxyimino-6-hydroxy-4,5,6,7-tetrahydrobenzofuraza                                        | C <sub>14</sub> H <sub>30</sub>                               | 198 |        |        | 8.525  |       |       | 0.065       |

| n    |                                                                                               |                                                |     |        |        |        |       |             |
|------|-----------------------------------------------------------------------------------------------|------------------------------------------------|-----|--------|--------|--------|-------|-------------|
| 2,6- | Pyridinedicarboxylic acid                                                                     | C <sub>7</sub> H <sub>5</sub> NO <sub>4</sub>  | 167 |        | 8.769  |        |       | 0.089       |
|      | 4,6-di-tert-Butyl-m-cresol                                                                    | C <sub>15</sub> H <sub>24</sub> O              | 220 |        | 9.089  |        |       | 0.071       |
|      | trans-2-Hexadecenoic acid                                                                     | C <sub>18</sub> H <sub>30</sub> O <sub>5</sub> | 326 |        | 9.172  |        |       | 0.083       |
|      | m-Toluic acid, 2-butyl ester                                                                  | C <sub>12</sub> H <sub>16</sub> O <sub>2</sub> | 192 |        | 9.772  |        |       | 0.077       |
|      | 1-Benzoxirene-2,5-dione, 4-(3-oxobutyl) hexahydro -3,3,4-trimethyl                            | C <sub>13</sub> H <sub>18</sub> O <sub>4</sub> | 238 |        | 9.873  |        |       | 0.083       |
|      | Hexadecane                                                                                    | C <sub>16</sub> H <sub>34</sub>                | 226 | 19.379 | 10.175 | 10.181 | 0.095 | 0.053 0.042 |
|      | 4-Ethylbenzoic acid, 6-ethyl-3-octyl ester                                                    | C <sub>19</sub> H <sub>30</sub> O <sub>2</sub> | 290 |        | 10.567 |        |       | 0.071       |
|      | 2,5-Octadecadiynoic acid, methyl ester                                                        | C <sub>19</sub> H <sub>30</sub> O <sub>2</sub> | 100 |        | 10.727 |        |       | 0.065       |
|      | 9-Hexadecenoic acid                                                                           | C <sub>16</sub> H <sub>30</sub> O <sub>2</sub> | 254 |        | 11.582 | 12.081 |       | 0.237 0.077 |
| (E)- | 10-Heptadecen-8-ynoic acid, methyl ester                                                      | C <sub>18</sub> H <sub>30</sub> O <sub>2</sub> | 278 |        | 11.926 |        |       | 0.318       |
|      | Phthalic acid, butyl undecyl ester                                                            | C <sub>23</sub> H <sub>36</sub> O <sub>4</sub> | 370 |        | 12.241 |        |       | 0.368       |
|      | Phthalic acid, ethyl octadecyl ester                                                          | C <sub>28</sub> H <sub>46</sub> O <sub>4</sub> | 446 |        | 12.537 | 12.579 |       | 0.184 0.077 |
|      | Phthalic acid, butyl tridecyl ester                                                           | C <sub>25</sub> H <sub>40</sub> O <sub>4</sub> | 404 |        | 12.876 |        |       | 0.202       |
|      | 4-ethyl-4-methyl-2-pentadecyl-1,3-Dioxolane                                                   | C <sub>21</sub> H <sub>42</sub> O <sub>2</sub> | 326 |        | 14.829 |        |       | 0.184       |
|      | 2-bromo- Octadecanal                                                                          | C <sub>18</sub> H <sub>35</sub> BrO            | 347 |        | 15.624 |        |       | 0.228       |
|      | 12-Methyl-E, E-2,13-octadecadien-1-ol                                                         | C <sub>19</sub> H <sub>36</sub> O              | 280 |        | 15.748 |        |       | 0.157       |
|      | (3β,5Z,7E)- 9,10-Secocholesta-5,7,10(19)-triene-3,24,25-triol                                 | C <sub>27</sub> H <sub>44</sub> O <sub>3</sub> | 416 |        | 16.39  |        |       | 0.166       |
|      | 3,6,13,16-tetraoxatricyclo[16.2.2.2(8,11)]tetracos-8,10,18,20,21,23-hexaene-2,7,12,17-tetrone | C <sub>20</sub> H <sub>16</sub> O <sub>8</sub> | 384 |        | 18.835 | 18.841 |       | 0.244 0.281 |
|      | 19.043 19                                                                                     |                                                |     |        |        |        |       |             |
|      | n-Hexyl acrylate                                                                              | C <sub>9</sub> H <sub>16</sub> O <sub>2</sub>  | 156 |        | 3.777  |        |       | 0.196       |
|      | (1-Allylcyclopropyl)methanol                                                                  | C <sub>7</sub> H <sub>12</sub> O               | 112 |        | 3.991  |        |       | 0.101       |

|                                                                                            |                                                               |     |        |        |       |       |
|--------------------------------------------------------------------------------------------|---------------------------------------------------------------|-----|--------|--------|-------|-------|
| Benzaldehyde                                                                               | C <sub>7</sub> H <sub>6</sub> O                               | 106 |        | 4.418  |       | 0.071 |
| 2-methyl-1-Hexen-3-yne                                                                     | C <sub>7</sub> H <sub>10</sub>                                | 94  |        | 4.513  |       | 0.113 |
| 2-Nitrohept-2-en-1-ol                                                                      | C <sub>7</sub> H <sub>13</sub> NO <sub>3</sub>                | 159 | 8.904  | 4.673  | 0.191 | 0.152 |
| N- $\alpha$ ,N- $\omega$ -Di-cbz-L-arginine                                                | C <sub>22</sub> H <sub>26</sub> N <sub>4</sub> O <sub>6</sub> | 410 |        | 5.089  |       | 0.1   |
| Pentanedinitrile                                                                           | C <sub>5</sub> H <sub>6</sub> N <sub>2</sub>                  | 94  |        | 5.347  |       | 0.087 |
| 4-(1,1-dimethylethyl)-Pyridine                                                             | C <sub>9</sub> H <sub>13</sub> N                              | 135 |        | 5.748  |       | 0.063 |
| Benzyl nitrile                                                                             | C <sub>8</sub> H <sub>7</sub> N                               | 117 |        | 6.181  |       | 0.062 |
| 1,3-dithian-2-ylphenyl-Methanone                                                           | C <sub>11</sub> H <sub>12</sub> OS <sub>2</sub>               | 224 |        | 6.3    |       | 0.086 |
| Carbon Tetrachloride                                                                       | CCl <sub>4</sub>                                              | 154 | 12.499 | 6.585  | 0.085 | 0.072 |
| [(hexadecyloxy)methyl]-Oxirane                                                             | C <sub>19</sub> H <sub>38</sub> O <sub>2</sub>                | 298 |        | 7.178  |       | 0.098 |
| 4-(2,4,4-Trimethylcyclohexa-1,5-dienyl)-but-3-en-2-one                                     | C <sub>13</sub> H <sub>18</sub> O                             | 190 |        | 7.279  |       | 0.119 |
| 1,2-Ethanediol, monobenzoate                                                               | C <sub>9</sub> H <sub>10</sub> O <sub>3</sub>                 | 166 |        | 8.769  |       | 0.069 |
| 4-methyl- Benzoic acid, 2-methylpropyl ester                                               | C <sub>12</sub> H <sub>16</sub> O <sub>2</sub>                | 192 |        | 9.778  |       | 0.077 |
| Pentadecyl decanoate                                                                       | C <sub>25</sub> H <sub>50</sub> O <sub>2</sub>                | 382 |        | 10.638 |       | 0.089 |
| Tetradecanoic acid                                                                         | C <sub>14</sub> H <sub>28</sub> O <sub>2</sub>                | 228 |        | 11.368 |       | 0.043 |
| Z-(13,14-Epoxy)tetradec-11-en-1-ol acetate                                                 | C <sub>16</sub> H <sub>28</sub> O <sub>3</sub>                | 268 |        | 11.825 |       | 0.066 |
| Phthalic acid, butyl tetradecyl ester                                                      | C <sub>26</sub> H <sub>42</sub> O <sub>4</sub>                | 418 |        | 12.241 |       | 0.053 |
| Phthalic acid, ethyl octadecyl ester                                                       | C <sub>16</sub> H <sub>22</sub> O <sub>4</sub>                | 278 |        | 12.87  |       | 0.083 |
| Oleic Acid                                                                                 | C <sub>18</sub> H <sub>34</sub> O <sub>2</sub>                | 282 |        | 13.909 |       | 0.083 |
| 4,4'-(1-methylethylidene) bis-Phenol                                                       | C <sub>15</sub> H <sub>16</sub> O <sub>2</sub>                | 288 | 26.833 | 14.3   | 0.111 | 0.089 |
| Z-5-Methyl-6-heneicosen-11-one                                                             | C <sub>22</sub> H <sub>42</sub> O                             | 322 |        | 16.111 |       | 0.160 |
| (15 $\beta$ ,16E)-16,17,20,21-tetrahydro-16-(hydroxymethyl)-18,19-Secoyohimban-19-oic acid | C <sub>21</sub> H <sub>24</sub> N <sub>2</sub> O <sub>3</sub> | 352 |        | 16.265 |       | 0.142 |
| bis (ethylene ketal)-Adamantane-2,6-dione                                                  | C <sub>14</sub> H <sub>20</sub> O <sub>4</sub>                | 252 |        | 16.55  |       | 0.101 |
| 1,1'-[1,3-propanediylbis(oxy)]                                                             | C <sub>39</sub> H <sub>80</sub> O <sub>2</sub>                | 580 |        | 17.224 |       | 0.081 |

|                                                                                          |                                                               |       |        |        |       |
|------------------------------------------------------------------------------------------|---------------------------------------------------------------|-------|--------|--------|-------|
| bis- Octadecane                                                                          |                                                               |       |        |        |       |
| 2,2,4-Trimethyl-3-(3,8,12,16-tetramethylheptadeca-3,7,11,15-tetraenyl)-cyclohexanol      | C <sub>30</sub> H <sub>52</sub> O                             | 428   |        | 17.636 | 0.065 |
| 1,1-Dimethyl-3-chloropropanol                                                            | C <sub>5</sub> H <sub>11</sub> ClO                            | 122.5 | 4.779  |        | 0.179 |
| 2,3-dichloro-2-methyl-Butane                                                             | C <sub>5</sub> H <sub>10</sub> Cl <sub>2</sub>                | 141   | 5.117  |        | 0.432 |
| 1,2-Ethanediol, monoacetate                                                              | C <sub>4</sub> H <sub>8</sub> O <sub>3</sub>                  | 104   | 5.626  |        | 0.173 |
| N,N-Dimethylacetamide                                                                    | C <sub>4</sub> H <sub>9</sub> NO                              | 87    | 6.092  |        | 0.196 |
| 1,1-Dichloro-2,3-dimethylcyclopropane                                                    | C <sub>5</sub> H <sub>8</sub> Cl <sub>2</sub>                 | 139   | 6.341  |        | 0.249 |
| 1,4-dichloro-2-Butanol                                                                   | C <sub>4</sub> H <sub>8</sub> Cl <sub>2</sub> O               | 109.5 | 8.321  |        | 0.212 |
| 1-Chloro-2-ethoxy-2-methoxy-propane                                                      | C <sub>6</sub> H <sub>13</sub> ClO <sub>2</sub>               | 86.5  | 8.708  |        | 0.145 |
| 1,1-dichloro-2-chloromethyl-2-methyl- Cyclopropane                                       | C <sub>5</sub> H <sub>7</sub> Cl <sub>3</sub>                 | 173.5 | 9.168  |        | 0.185 |
| 2,3-dichloro-2-methyl-Propanal                                                           | C <sub>4</sub> H <sub>6</sub> Cl <sub>2</sub> O               | 141   | 9.584  |        | 0.154 |
| 1,2,3-trichloro-2-methyl- Propane                                                        | C <sub>4</sub> H <sub>7</sub> Cl <sub>3</sub>                 | 161.5 | 9.746  |        | 0.19  |
| 2-Chloromethyl-1,3-dichloro-2-methylpropane                                              | C <sub>5</sub> H <sub>9</sub> Cl <sub>3</sub>                 | 288.5 | 10.185 |        | 0.148 |
| 2,3-dichloro-2,3-dimethyl-Cyclopropane carboxylic acid, anhydride with hypochlorous acid | C <sub>6</sub> H <sub>7</sub> Cl <sub>3</sub> O <sub>2</sub>  | 288.5 | 10.519 |        | 0.111 |
| 6-methyl- Octadecane                                                                     | C <sub>19</sub> H <sub>40</sub>                               | 248   | 10.969 |        | 0.164 |
| (isocyanomethyl)-Benzene                                                                 | C <sub>8</sub> H <sub>7</sub> N                               | 117   | 11.763 |        | 0.106 |
| N, N'-di-benzoyloxy-Hexanediamide                                                        | C <sub>20</sub> H <sub>20</sub> N <sub>2</sub> O <sub>6</sub> | 384   | 12.081 |        | 0.101 |
| 2-(2,4-dichlorophenoxy)-Ethanol                                                          | C <sub>8</sub> H <sub>8</sub> Cl <sub>2</sub> O <sub>2</sub>  | 207   | 12.277 |        | 0.122 |
| 2,3-Dichloro-7-methylenebicyclo[2.2.1]heptane                                            | C <sub>8</sub> H <sub>10</sub> Cl <sub>2</sub>                | 177   | 12.785 |        | 0.053 |
| 2,5-dichloro- Phenol, acetate                                                            | C <sub>8</sub> H <sub>6</sub> Cl <sub>2</sub> O <sub>2</sub>  | 205   | 13.944 |        | 0.111 |
| 1,1-dichloro-1-Propene                                                                   | C <sub>3</sub> H <sub>4</sub> Cl <sub>2</sub>                 | 111   | 13.14  |        | 0.079 |
| 2,4-dimethyl-                                                                            | C <sub>9</sub> H <sub>10</sub> O                              | 196   | 13.225 |        | 0.117 |



|                         |                     |       |        |       |
|-------------------------|---------------------|-------|--------|-------|
| Benzaldehyde            |                     |       |        |       |
| 2,6-dichloro-2,5-       |                     |       |        |       |
| Cyclohexadiene-1,4-     | $C_6H_2Cl_2O_2$     | 177   | 13.442 | 0.127 |
| dione                   |                     |       |        |       |
| 1,1,3,3-tetrachloro-2-  |                     |       |        |       |
| methyl- Propane         | $C_4H_6Cl_4$        | 196   | 13.51  | 0.055 |
| 5-ethyl-5-methyl-       |                     |       |        |       |
| Decane                  | $C_{13}H_{28}$      | 184   | 14.289 | 0.077 |
| 2,3,5,8-tetramethyl-    |                     |       |        |       |
| Decane                  | $C_{14}H_{30}$      | 198   | 14.453 | 0.09  |
| p-tert-butyl- Phenol    | $C_{10}H_{14}O$     | 150   | 14.575 | 0.042 |
| Ascaridole epoxide      | $C_{10}H_{16}O_3$   | 184   | 14.765 | 0.092 |
| 2,4,6-trichloro- Phenol | $C_6H_3Cl_3O$       | 131.5 | 15.618 | 0.103 |
| Dodecanal;              | $C_{12}H_{24}O$     | 184   | 16.476 | 0.139 |
| E-2-Hexenyl benzoate    | $C_{13}H_{16}O_2$   | 204   | 16.666 | 0.079 |
| 2,6-Dichloro-4-(1,1-    |                     |       |        |       |
| dimethylethyl)phenol    | $C_{10}H_{12}Cl_2O$ | 219   | 18.334 | 0.099 |
| 4-chloro-2,6-bis(1,1-   |                     |       |        |       |
| dimethylethyl)- Phenol  | $C_{14}H_{21}ClO$   | 240.5 | 18.589 | 0.079 |
| 2,5-dichloro-1,4-       |                     |       |        |       |
| Benzenediol             | $C_6H_4Cl_2O_2$     | 179   | 18.945 | 0.207 |
| (E)- 10-Heptadecen-8-   |                     |       |        |       |
| ynoic acid, methyl      | $C_{18}H_{30}O_2$   | 278   | 19.487 | 0.148 |
| ester                   |                     |       |        |       |
| 4-amino-2,3,6-          |                     |       |        |       |
| trichloro- phenol       | $C_6H_4Cl_3NO$      | 212.5 | 19.86  | 0.159 |
| 9-hexyl- Heptadecane    | $C_{23}H_{48}$      | 324   | 20.739 | 0.09  |
| 1-(5-Ethyl-             |                     |       |        |       |
| tetrahydrofuran-2-yl)-  |                     |       |        |       |
| 3,3-dimethyl-butan-2-   | $C_{12}H_{22}O_2$   | 198   | 20.839 | 0.064 |
| one                     |                     |       |        |       |
| 2,6,10,14-tetramethyl-  |                     |       |        |       |
| Hexadecane              | $C_{20}H_{42}$      | 282   | 20.972 | 0.085 |
| Heptacosane             | $C_{27}H_{56}$      | 380   | 22.142 | 0.207 |
| 1,2-                    |                     |       |        |       |
| Benzenedicarboxylic     | $C_{17}H_{24}O_4$   | 292   | 23.54  | 0.101 |
| acid, monononyl ester   |                     |       |        |       |
| Phthalic acid, bis(7-   |                     |       |        |       |
| methyloctyl) ester      | $C_{26}H_{42}O_4$   | 418   | 24.292 | 0.175 |
| 12-Methyl-E, E-2,13-    |                     |       |        |       |
| octadecadien-1-ol       | $C_{19}H_{36}O$     | 280   | 29.645 | 0.093 |
| 3-ethyl-5-(2-           |                     |       |        |       |
| ethylbutyl)-            |                     |       |        |       |
| Octadecane              | $C_{26}H_{54}$      | 366   | 29.878 | 0.154 |
| E, E, Z-1,3,12-         |                     |       |        |       |
| Nonadecatriene-5,14-    | $C_{19}H_{34}O_2$   | 294   | 30.196 | 0.136 |
| diol                    |                     |       |        |       |
| 2-((2H-benzotriazo)-2-  |                     |       |        |       |
| yl)-4-(1,1,3,3-         | $C_{20}H_{25}N_3O$  | 323   | 30.974 | 0.143 |
| tetramethylbutyl)       |                     |       |        |       |

|                                            |                    |     |        |       |
|--------------------------------------------|--------------------|-----|--------|-------|
| phenol<br>cis-9,10-<br>Epoxyoctadecanamide | $C_{18}H_{35}NO_2$ | 297 | 32.621 | 0.228 |
|--------------------------------------------|--------------------|-----|--------|-------|

**Table S4** Change analysis of organic species (0 h, 2 h, 4 h, 5 h)

| Organic species        | Electrolytic time | 0 h | 2 h | 4 h | 5 h |
|------------------------|-------------------|-----|-----|-----|-----|
| Aromatic hydrocarbons  |                   | 7   | 5   | 6   | 4   |
| Straight-chain alkanes |                   | 13  | 3   | 4   | 2   |
| Cycloalkane            |                   | 3   | 3   | 1   | 3   |
| Straight-chain olefins |                   | 1   | 0   | 2   | 0   |
| Cyclic olefins         |                   | 0   | 1   | 1   | 0   |
| Esters                 |                   | 9   | 11  | 12  | 8   |
| Alcohols and phenols   |                   | 13  | 8   | 3   | 0   |
| Ketoaldehydes          |                   | 5   | 7   | 6   | 4   |
| Amides                 |                   | 5   | 4   | 0   | 0   |
| Other                  |                   | 7   | 5   | 4   | 3   |

**Table S5** Five-step determination of chlorine content in water under different operating factors (current density:  $90 \text{ mA} \cdot \text{cm}^{-2}$ )

|                  | pH=7, 5 h | $A/V=4.25 \text{ m}^{-1}$ , 5 h | $A/V=5.67 \text{ m}^{-1}$ , 5 h |
|------------------|-----------|---------------------------------|---------------------------------|
| $\text{ClO}_2$   | 0.45      | 0                               | 0                               |
| $\text{ClO}_2^-$ | 0         | 8.07                            | 0                               |
| $\text{ClO}_3^-$ | 943       | 1414                            | 486                             |
| $\text{Cl}_2$    | 21        | 41                              | 4                               |

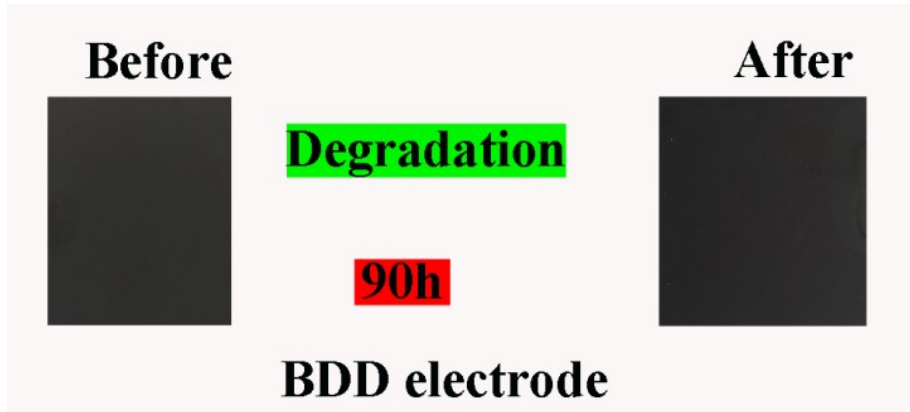

Figure S1 Comparison of morphology before and after degradation

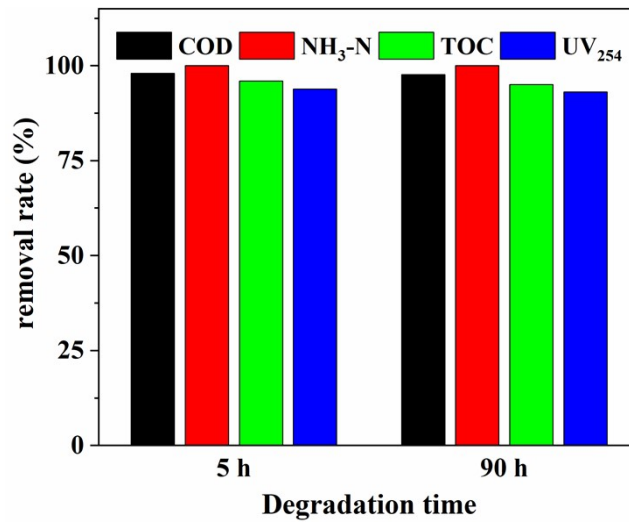

Figure S2 Comparison of performance of landfill leachate degraded by BDD electrode for 5 h and 90 h

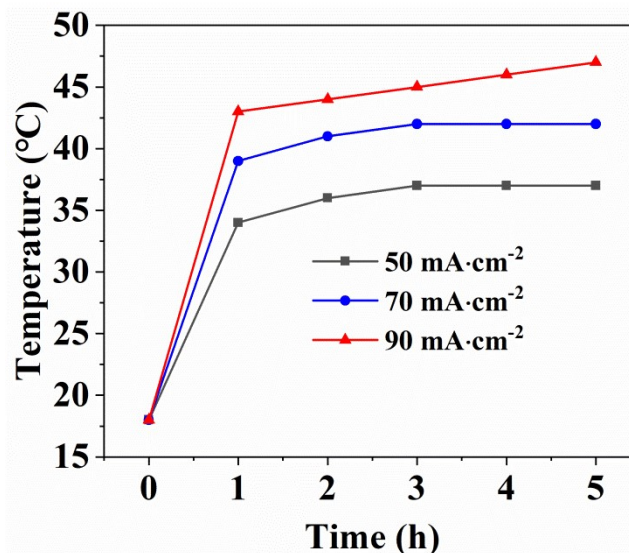

Figure S3 Temperature changes with time at different current densities

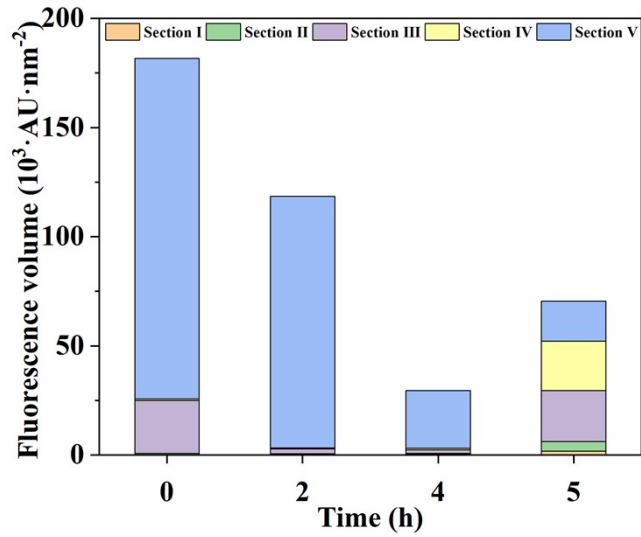

**Figure S4** Fluorescence volume distribution in different regions at different processing times

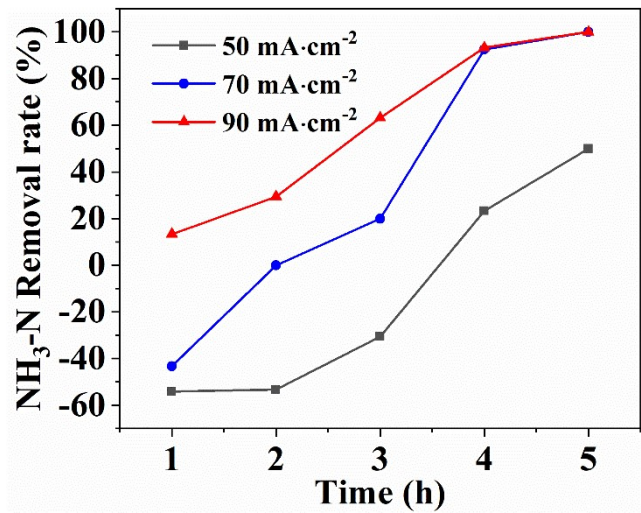

**Figure S5** Effect of different current density and degradation time on NH<sub>3</sub>-H removal rate

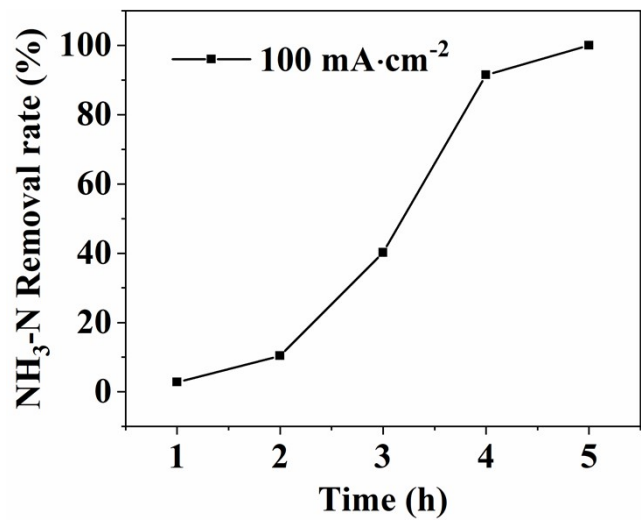

**Figure S6** Effect of degradation time on NH<sub>3</sub>-H removal rate (current density: 100 mA·cm<sup>-2</sup>)

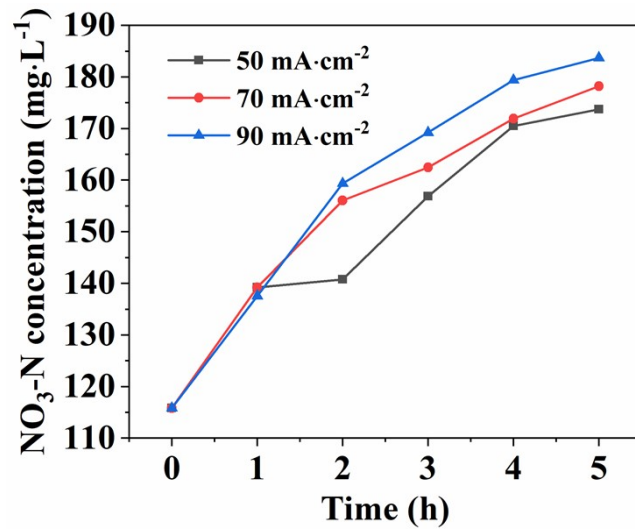

**Figure S7** Effect of different current densities and degradation time on NO<sub>3</sub>-N concentration

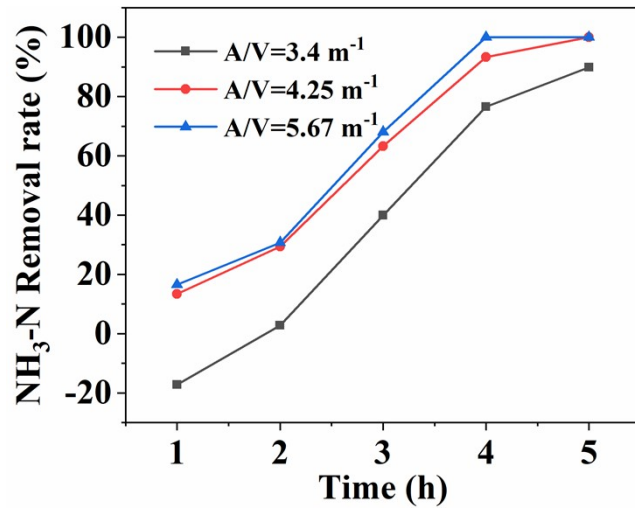

**Figure S8** Effect of different A/V values and degradation time on NH<sub>3</sub>-N removal rate

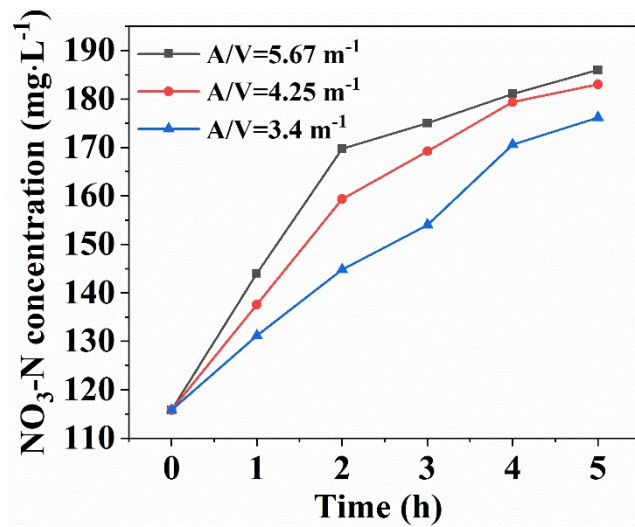

**Figure S9** Effect of different A/V values and degradation time on NO<sub>3</sub>-N concentration

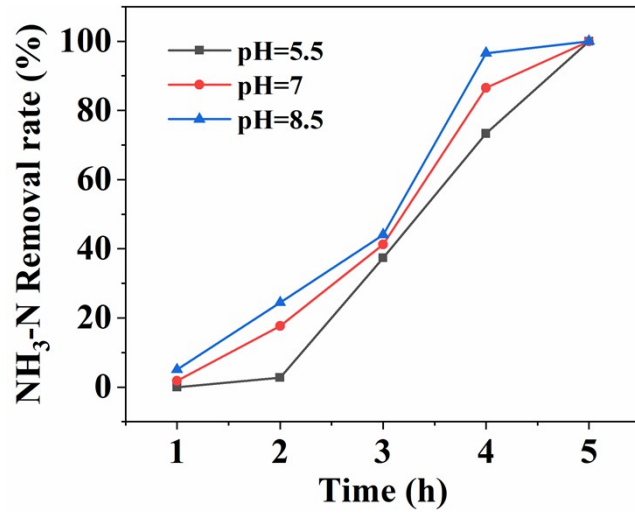

**Figure S10** Effect of different initial pH values and degradation time on  $\text{NH}_3\text{-N}$  removal rate

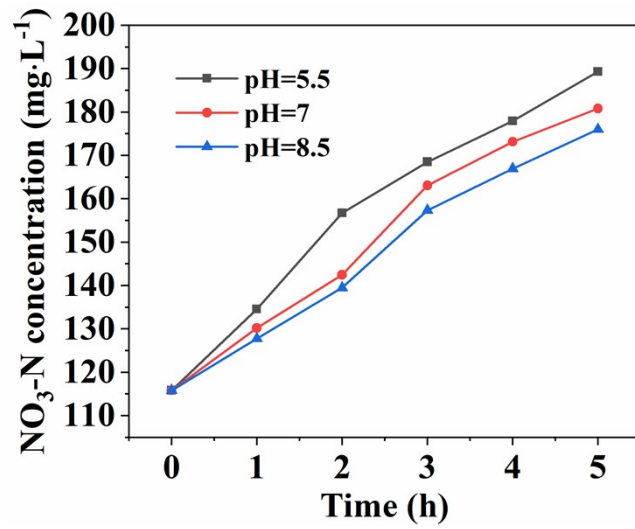

**Figure S11** Effect of different initial pH values and degradation time on  $\text{NO}_3\text{-N}$  concentration

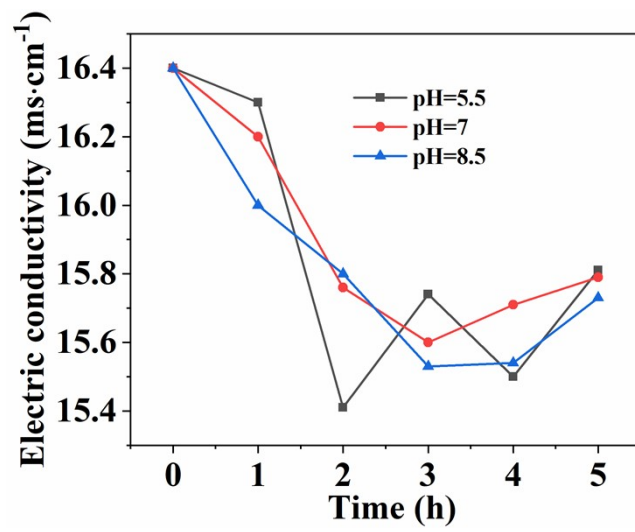

Figure S12 Effect of different initial pH and degradation time on electric conductivity

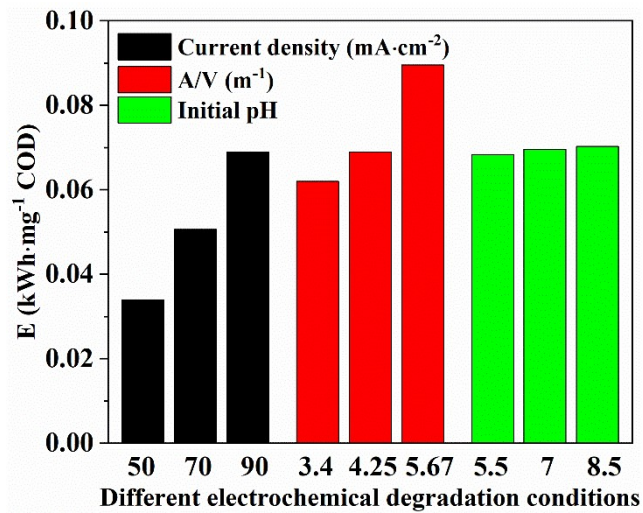

Figure S13 The energy consumption at the reaction time of 5 h varies with different current densities, A/V values, and initial pH values
